# Supplementary material for: Clinical, Bacteriologic, and Geographic Stratification of Melioidosis Emerges from the Sri Lankan National Surveillance Program
Source: PubMed Central journal article supplement (PMC5929190; doi:10.4269/ajtmh.17-0441), 2018-01-08
Supplement: tpmd170441.SD1.pdf [file tpmd170441.SD1.pdf]

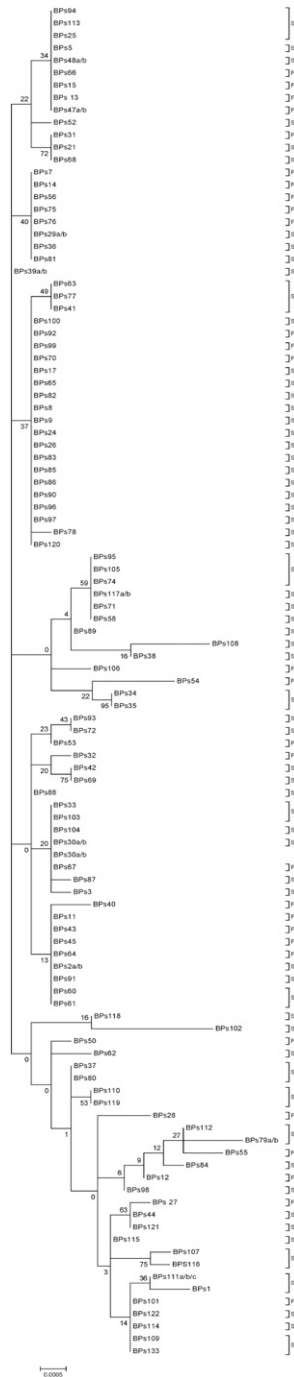

SUPPLEMENTAL FIGURE 1. Maximum likelihood tree of Sri Lankan clinical culture collection. The evolutionary history was inferred using the maximum likelihood method based on the Tamura–Nei model.<sup>23</sup> The tree with the highest log likelihood (–5,128.7110) is shown. The percentage of trees in which the associated taxa clustered together is shown next to the branches. Initial tree(s) for the heuristic search were obtained automatically by applying Neighbor-Join and BioNJ algorithms to a matrix of pairwise distances estimated using the maximum composite likelihood approach, and then selecting the topology with superior log likelihood value. A discrete gamma distribution was used to model evolutionary rate differences among sites (four categories [+G, parameter = 0.0500]). The rate variation model allowed for some sites to be evolutionarily invariable ([+I], 49.60% sites). The tree is drawn to scale, with branch lengths measured in the number of substitutions per site. The analysis involved 109 nucleotide sequences. All positions containing gaps and missing data were eliminated. There were a total of 3,401 positions in the final dataset. Evolutionary analyses were conducted in MEGA7.<sup>22</sup>

SUPPLEMENTAL TABLE 1

The largest clinico-pathological group (SS) had a single organ system focus and a positive blood culture. None of these had a significantly raised or lowered odds ratio for the commonly cited melioidosis risk factors. The lack of significant association between these risk factors and the SS clinico-pathological category of infection only indicates a lack of demonstrable stratification within the group.

| Infection | Association | $\chi^2$ | <i>P</i> |
|-----------|-------------|----------|----------|
| Farmer    | SS          | 1.42     | NS       |
| Housewife | SS          | 0.84     | NS       |
| Diabetic  | SS          | 0.86     | NS       |
| Alcohol   | SS          | 0.02     | NS       |
| Rice      | SS          | 1.78     | NS       |
| Gardening | SS          | 0.02     | NS       |
| Floods    | SS          | 1.30     | NS       |

NS = non significant; SS = blood culture-positive sepsis with single organ system focus. There is a lack of significant association between main epidemiologic descriptors and the commonest major clinicopathologic class (SS).

SUPPLEMENTAL TABLE 2  
Isolate ID, year of case, loci alleles, and ST for isolates included in the study

| ID   | Isolate | Year | Loci |      |      |      |      |      |     | ST (MLST) |
|------|---------|------|------|------|------|------|------|------|-----|-----------|
|      |         |      | ace  | gltB | gmhD | lepA | lipA | narK | ndh |           |
| 344  | BPs42   | 2014 | 1    | 1    | 6    | 2    | 1    | 1    | 1   | 912       |
| 353  | BPs43   | 2014 | 1    | 12   | 6    | 2    | 1    | 1    | 3   | 1132      |
| 366  | BPs44   | 2014 | 4    | 4    | 14   | 2    | 1    | 2    | 1   | 13        |
| 422  | BPs47a  | 2014 | 1    | 2    | 6    | 4    | 1    | 2    | 57  | 1135      |
| 684  | BPs48a  | 2014 | 1    | 2    | 6    | 4    | 1    | 2    | 57  | 1135      |
| 689  | BPs50   | 2014 | 1    | 2    | 3    | 3    | 1    | 2    | 3   | 308       |
| 693  | BPs52   | 2014 | 1    | 12   | 6    | 4    | 1    | 2    | 3   | 194       |
| 701  | BPs53   | 2014 | 1    | 4    | 6    | 2    | 1    | 1    | 3   | 293       |
| 712  | BPs54   | 2014 | 1    | 4    | 13   | 2    | 1    | 1    | 58  | 338       |
| 989  | BPs55   | 2014 | 4    | 12   | 3    | 4    | 1    | 1    | 20  | 474       |
| 990  | BPs56   | 2014 | 1    | 2    | 6    | 2    | 1    | 2    | 57  | 1136      |
| 1024 | BPs62   | 2014 | 1    | 2    | 3    | 4    | 1    | 2    | 57  | 590       |
| 1030 | BPs64   | 2014 | 1    | 12   | 6    | 2    | 1    | 1    | 3   | 1132      |
| 1031 | BPs79   | 2015 | 4    | 4    | 3    | 4    | 3    | 1    | 20  | 598       |
| 1073 | BPs82   | 2015 | 1    | 2    | 6    | 2    | 1    | 8    | 3   | 1137      |
| 1117 | BPs87   | 2015 | 4    | 2    | 14   | 2    | 1    | 1    | 3   | 615       |
| 1118 | BPs90   | 2015 | 1    | 2    | 6    | 2    | 1    | 8    | 3   | 1137      |
| 1141 | BPs95   | 2015 | 1    | 2    | 14   | 2    | 5    | 2    | 1   | 1434      |
| 1164 | BPs104  | 2015 | 4    | 2    | 6    | 2    | 1    | 1    | 3   | 1140      |
| 1183 | BPs105  | 2015 | 1    | 2    | 14   | 2    | 5    | 2    | 1   | 1434      |
| 1236 | BPs106  | 2015 | 1    | 4    | 6    | 2    | 5    | 8    | 3   | 733       |
| 1322 | BPs107  | 2015 | 4    | 4    | 10   | 2    | 1    | 8    | 11  | 867       |
| 1333 | BPs108a | 2015 | 1    | 4    | 14   | 4    | 3    | 42   | 1   | 944       |
| 1578 | BPs109  | 2015 | 1    | 4    | 3    | 2    | 1    | 2    | 1   | 594       |
| 1808 | BPs110  | 2015 | 1    | 4    | 3    | 4    | 1    | 2    | 3   | 1152      |
| 1881 | BPs113  | 2015 | 1    | 2    | 6    | 4    | 1    | 2    | 57  | 1135      |
| 1929 | BPs114  | 2015 | 1    | 4    | 3    | 2    | 1    | 2    | 1   | 594       |
| 2116 | BPs116  | 2015 | 4    | 4    | 10   | 2    | 1    | 8    | 20  | 1179      |
| 2117 | BPs117  | 2015 | 1    | 2    | 14   | 2    | 5    | 2    | 1   | 1434      |
| 2118 | BPs118  | 2015 | 1    | 2    | 14   | 4    | 1    | 8    | 1   | 1314      |
| 2119 | BPs119  | 2015 | 1    | 4    | 3    | 4    | 1    | 2    | 3   | 1152      |
| 2123 | BPs120  | 2015 | 1    | 2    | 6    | 2    | 1    | 8    | 3   | 1137      |
| 2129 | BPs121  | 2015 | 4    | 4    | 14   | 2    | 1    | 2    | 1   | 13        |
| 2130 | BPs122  | 2015 | 1    | 4    | 3    | 2    | 1    | 2    | 1   | 594       |
| 2131 | BPs45   | 2014 | 1    | 12   | 6    | 2    | 1    | 1    | 3   | 1132      |
| 2132 | BPs68   | 2015 | 8    | 2    | 6    | 4    | 1    | 2    | 3   | 1139      |
| 2133 | BPs75   | 2015 | 1    | 2    | 6    | 2    | 1    | 2    | 57  | 1136      |
| 2135 | BPs92   | 2015 | 1    | 2    | 6    | 2    | 1    | 8    | 3   | 1137      |
| 2136 | BPs93   | 2015 | 1    | 4    | 6    | 2    | 1    | 1    | 1   | 1435      |
| 2139 | BPs103  | 2015 | 4    | 2    | 6    | 2    | 1    | 1    | 3   | 1140      |
| 2140 | BPs111  | 2015 | 1    | 4    | 3    | 2    | 1    | 1    | 1   | 1364      |
| 2141 | BPs115  | 2015 | 4    | 4    | 3    | 2    | 1    | 2    | 1   | 1413      |
| 2151 | BPs133  | 2015 | 1    | 4    | 3    | 2    | 1    | 2    | 1   | 594       |
| 2155 | BPs112  | 2015 | 4    | 4    | 3    | 4    | 1    | 1    | 20  | 1442      |
| 3422 | BPs2a/b | 2006 | 1    | 12   | 6    | 2    | 1    | 1    | 3   | 1132      |
| 3423 | BPs1    | 2007 | 1    | 4    | 10   | 1    | 1    | 1    | 1   | 1133      |
| 3424 | BPs3    | 2008 | 4    | 12   | 6    | 2    | 1    | 1    | 3   | 1134      |
| 3425 | Bps5    | 2008 | 1    | 2    | 6    | 4    | 1    | 2    | 57  | 1135      |
| 3426 | BPs7    | 2009 | 1    | 2    | 6    | 2    | 1    | 2    | 57  | 1136      |
| 3427 | BPs8    | 2010 | 1    | 2    | 6    | 2    | 1    | 8    | 3   | 1137      |
| 3428 | BPs9    | 2010 | 1    | 2    | 6    | 2    | 1    | 8    | 3   | 1137      |
| 3429 | BPs11   | 2011 | 1    | 12   | 6    | 2    | 1    | 1    | 3   | 1132      |
| 3430 | BPs12   | 2011 | 4    | 4    | 3    | 4    | 1    | 1    | 3   | 1138      |
| 3431 | BPs13   | 2011 | 1    | 2    | 6    | 4    | 1    | 2    | 57  | 1135      |
| 3432 | BPs15   | 2011 | 1    | 2    | 6    | 4    | 1    | 2    | 57  | 1135      |
| 3433 | BPs17   | 2011 | 1    | 2    | 6    | 2    | 1    | 8    | 3   | 1137      |
| 3434 | BPs21   | 2011 | 8    | 2    | 6    | 4    | 1    | 2    | 3   | 1139      |
| 3435 | BPs24   | 2012 | 1    | 2    | 6    | 2    | 1    | 8    | 3   | 1137      |
| 3436 | BPs25   | 2012 | 1    | 2    | 6    | 4    | 1    | 2    | 57  | 1135      |
| 3437 | BPs26   | 2012 | 1    | 2    | 6    | 2    | 1    | 8    | 3   | 1137      |
| 3438 | BPs27   | 2012 | 55   | 4    | 14   | 2    | 1    | 2    | 1   | 1148      |
| 3439 | BPs28   | 2013 | 4    | 2    | 3    | 4    | 1    | 2    | 1   | 202       |
| 3440 | BPs29   | 2013 | 1    | 2    | 6    | 2    | 1    | 2    | 57  | 1136      |
| 3441 | BPs30   | 2013 | 4    | 2    | 6    | 2    | 1    | 1    | 3   | 1140      |
| 3442 | BPs30b  | 2014 | 4    | 2    | 6    | 2    | 1    | 1    | 3   | 1140      |
| 3443 | BPs31   | 2013 | 8    | 2    | 6    | 4    | 1    | 2    | 3   | 1139      |
| 3444 | BPs32   | 2013 | 1    | 2    | 14   | 2    | 1    | 1    | 1   | 1141      |
| 3445 | BPs33   | 2013 | 4    | 2    | 6    | 2    | 1    | 1    | 3   | 1140      |

(continued)

SUPPLEMENTAL TABLE 2

Continued

| ID   | Isolate | Year | Loci |      |      |      |      |      |     | ST (MLST) |
|------|---------|------|------|------|------|------|------|------|-----|-----------|
|      |         |      | ace  | gltB | gmhD | lepA | lipA | narK | ndh |           |
| 3446 | BPs34   | 2013 | 1    | 12   | 13   | 2    | 5    | 2    | 58  | 1142      |
| 3447 | BPs35   | 2013 | 1    | 12   | 13   | 2    | 5    | 2    | 58  | 1142      |
| 3448 | BPs36   | 2013 | 1    | 2    | 6    | 2    | 1    | 2    | 57  | 1136      |
| 3449 | BPs37   | 2013 | 1    | 4    | 3    | 2    | 1    | 2    | 3   | 1143      |
| 3450 | BPs38   | 2014 | 1    | 2    | 14   | 2    | 3    | 1    | 3   | 1144      |
| 3451 | BPs39   | 2014 | 1    | 2    | 6    | 2    | 1    | 2    | 3   | 1145      |
| 3452 | BPs40   | 2014 | 1    | 12   | 6    | 2    | 20   | 1    | 3   | 1146      |
| 3453 | BPs41   | 2014 | 1    | 12   | 6    | 2    | 1    | 8    | 3   | 1147      |
| 3454 | BPs14   | 2011 | 1    | 2    | 6    | 2    | 1    | 2    | 57  | 1136      |
| 4422 | BPs61   | 2014 | 1    | 12   | 6    | 2    | 1    | 1    | 3   | 1132      |
| 4423 | BPs66   | 2015 | 1    | 2    | 6    | 4    | 1    | 2    | 57  | 1135      |
| 4424 | BPs70   | 2015 | 1    | 2    | 6    | 2    | 1    | 8    | 3   | 1137      |
| 4425 | BPs71   | 2015 | 1    | 2    | 14   | 2    | 5    | 2    | 1   | 1434      |
| 4426 | BPs72   | 2015 | 1    | 4    | 6    | 2    | 1    | 1    | 1   | 1435      |
| 4427 | BPs76   | 2015 | 1    | 2    | 6    | 2    | 1    | 2    | 57  | 1136      |
| 4428 | BPs83   | 2015 | 1    | 2    | 6    | 2    | 1    | 8    | 3   | 1137      |
| 4429 | BPs80   | 2015 | 1    | 4    | 3    | 2    | 1    | 2    | 3   | 1143      |
| 4430 | BPs89   | 2015 | 1    | 2    | 14   | 2    | 5    | 2    | 3   | 1436      |
| 4431 | BPs96   | 2015 | 1    | 2    | 6    | 2    | 1    | 8    | 3   | 1137      |
| 4432 | BPs98   | 2015 | 4    | 4    | 3    | 2    | 1    | 1    | 3   | 1437      |
| 4433 | BPs85   | 2015 | 1    | 2    | 6    | 2    | 1    | 8    | 3   | 1137      |
| 4434 | BPs58   | 2014 | 1    | 2    | 14   | 2    | 5    | 2    | 1   | 1434      |
| 4435 | BPs60   | 2014 | 1    | 12   | 6    | 2    | 1    | 1    | 3   | 1132      |
| 4436 | BPs63   | 2014 | 1    | 12   | 6    | 2    | 1    | 8    | 3   | 1147      |
| 4437 | BPs65   | 2015 | 1    | 2    | 6    | 2    | 1    | 8    | 3   | 1137      |
| 4438 | BPs67   | 2015 | 4    | 2    | 6    | 2    | 1    | 1    | 3   | 1140      |
| 4439 | BPs69   | 2015 | 1    | 1    | 6    | 2    | 1    | 1    | 1   | 912       |
| 4440 | BPs74   | 2015 | 1    | 2    | 14   | 2    | 5    | 2    | 1   | 1434      |
| 4441 | BPs77   | 2015 | 1    | 12   | 6    | 2    | 1    | 8    | 3   | 1147      |
| 4442 | BPs78   | 2015 | 1    | 2    | 124  | 2    | 1    | 8    | 3   | 1438      |
| 4443 | BPs81   | 2015 | 1    | 2    | 6    | 2    | 1    | 2    | 57  | 1136      |
| 4444 | BPs84   | 2015 | 18   | 4    | 3    | 4    | 1    | 1    | 1   | 1439      |
| 4445 | BPs86   | 2015 | 1    | 2    | 6    | 2    | 1    | 8    | 3   | 1137      |
| 4446 | BPs88   | 2015 | 1    | 2    | 6    | 2    | 1    | 1    | 3   | 655       |
| 4447 | BPs91   | 2015 | 1    | 12   | 6    | 2    | 1    | 1    | 3   | 1132      |
| 4448 | BPs94   | 2015 | 1    | 2    | 6    | 4    | 1    | 2    | 57  | 1135      |
| 4449 | BPs97   | 2015 | 1    | 2    | 6    | 2    | 1    | 8    | 3   | 1137      |
| 4450 | BPs99   | 2015 | 1    | 2    | 6    | 2    | 1    | 8    | 3   | 1137      |
| 4451 | BPs101  | 2015 | 1    | 4    | 3    | 2    | 1    | 2    | 1   | 594       |
| 4452 | BPs100  | 2015 | 1    | 2    | 6    | 2    | 1    | 8    | 3   | 1137      |
| 4453 | BPs102  | 2015 | 1    | 16   | 13   | 4    | 6    | 21   | 1   | 132       |

MLST = multilocus sequence typing; ST = sequence types. Available for download from <https://pubmlst.org/bpseudomallei/>.
